# Supplementary material
Source: PubMed Central journal article supplement (PMC5002072)
Supplement: mmc1.pdf [file mmc1.pdf]

**Biophysical Journal, Volume 111**

**Supplemental Information**

**Costs of Clock-Environment Misalignment in Individual Cyanobacterial  
Cells**

**Guillaume Lambert, Justin Chew, and Michael J. Rust**

Supporting Material for:

Costs of Clock-Environment Misalignment in  
Individual Cyanobacterial Cells

Guillaume Lambert<sup>1</sup>, Justin Chew<sup>2</sup>, and Michael J. Rust<sup>1</sup>

<sup>1</sup> Department of Molecular Genetics and Cell Biology, Institute for Genomics and Systems Biology, University of Chicago, 900 E 57th Street, Chicago, IL 60637, United States

<sup>2</sup> Medical Scientist Training Program, Pritzker School of Medicine, University of Chicago, 924 E 57th Street, Chicago, IL 60637, United States

Contact: [mrust@uchicago.edu](mailto:mrust@uchicago.edu)

## SUPPLEMENTAL DATA

**Supplementary Movie S1.** Single-cell microscopy and mixed-phase experiments. Time-lapse movie showing wild-type cells in multiple phases growing in the same field of view. Production of yellow fluorescent proteins is under the control of the PkaiBC clock-dependent promoter.

**Supplementary Movie S2.** Dormancy following prolonged darkness. Movie showing wild-type cells being subjected to an 18h pulse of darkness. White arrows indicate which cells entered a state of arrested growth.

**Supplementary Movie S3.** Response of  $\Delta kaiBC$  mutants to 18h dark pulse. Movie showing a mixture of wild-type and  $\Delta kaiBC$  cells being subjected to an 18h pulse of darkness. A larger fraction of  $\Delta kaiBC$  cells display filamentous morphology compared to wild-type cells.  $\Delta kaiBC$  cells at the beginning of the movie are called out with red arrows.

**Supplementary Movie S4.** Response of *kaiBC*-overexpression mutants to 18h dark pulse. Movie showing a mixture of wild-type and *kaiBC*-overexpression cells being subjected to an 18h pulse of darkness. *kaiBC*-overexpression cells display abnormal rounded morphology compared to wild-type cells.  $P_{trc} :: kaiBC$  cells at the beginning of the movie are called out with blue arrows.

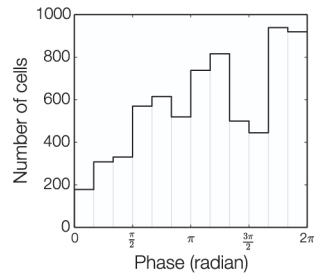

FIG. S1. Distribution of initial clock phases in single cells, estimated using the phase information from a Fourier transform of the EYFP reporter time series.

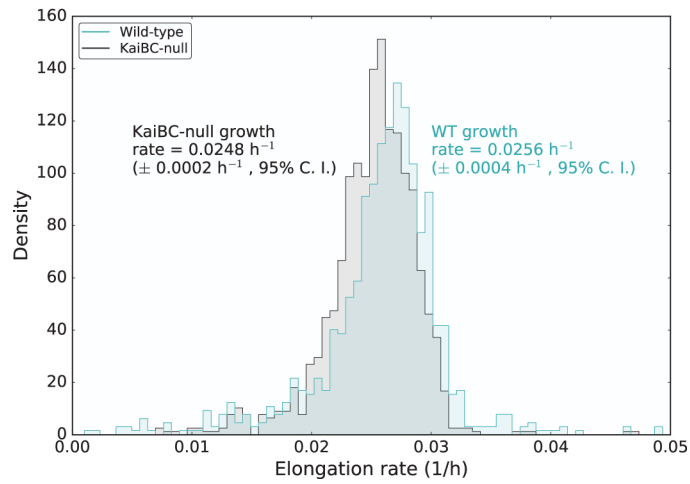

FIG. S2. Distribution of instantaneous growth rates of WT and  $\Delta kaiBC$  cells grown side-by-side on the microscope. Each data point in the distribution is the average elongation rate for one cell over the microscopy time course (N=989 for WT and N=1189 for  $\Delta kaiBC$ ). Means are different at a  $> 95\%$  confidence level.

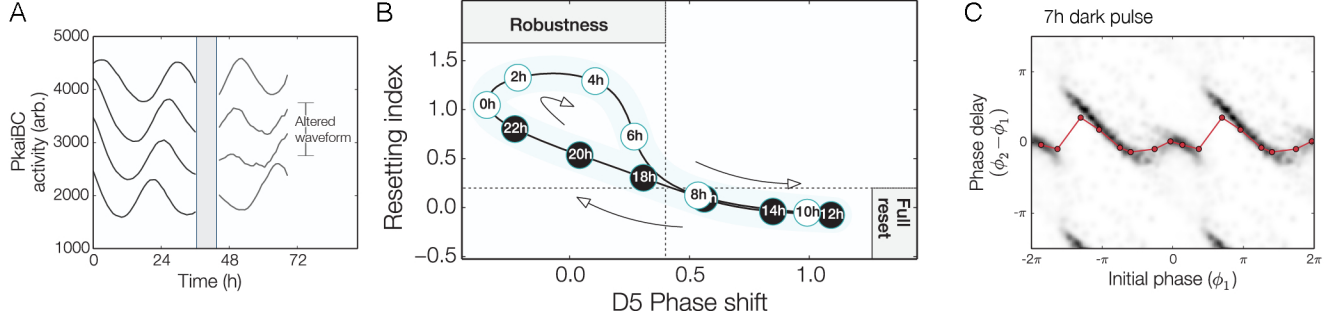

FIG. S3. Single cell phase resetting data A.) Averages of EYFP reporter signals before and after a dark pulse from groups of cells corresponding to approximately  $3\pi/5$ -wide bins of initial phase ( $> 600$  cells per waveform). B.) Model of the timekeeping switch between robustness and full clock reset. Robustness is defined as the magnitude of the phase shift following a 5h dark pulse. The resetting index measures the angle between subjective dusk ( $\pi$ ) and the posterior phase  $\phi_2$  following a 9h dark pulse. Subjective circadian times are inscribed inside each datapoint. C.) Comparison between the single-cell density distribution of the phase delay following a 7h dark pulse, and a population average (red). Phase shift data for the average is binned under a 2h window.

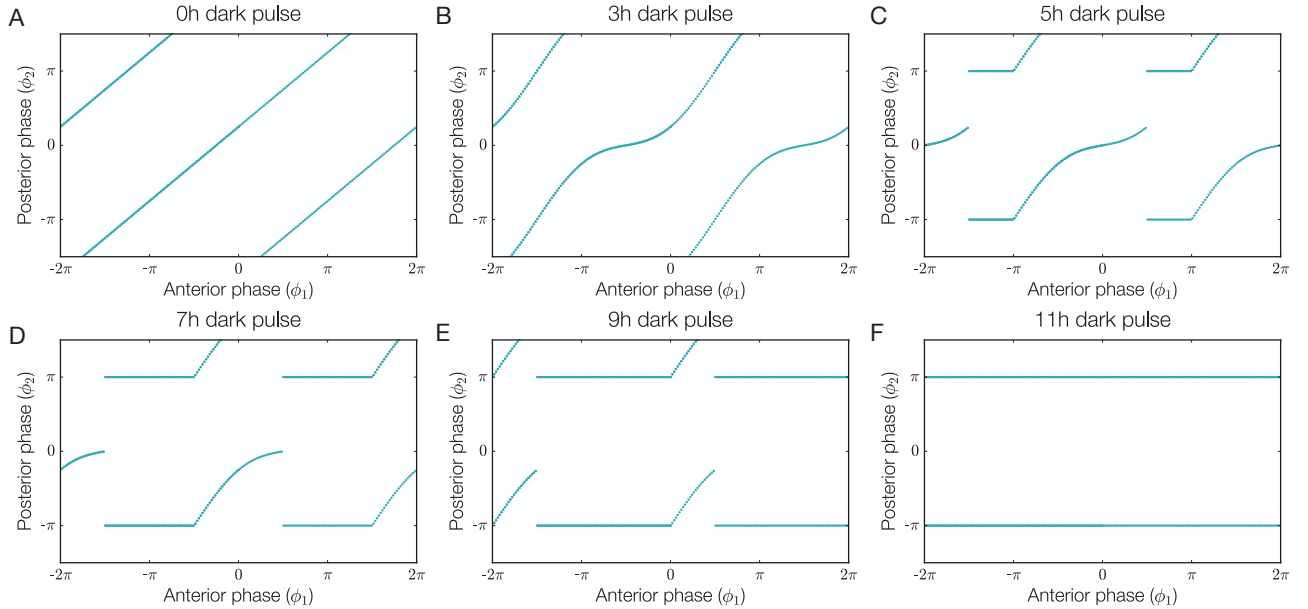

FIG. S4. Phenomenological model of clock resetting. Plots of the interpolating function:

$$f_n^P(\phi_i) = \begin{cases} \pi & \text{if } \frac{6\pi(n-9)}{P} < \phi_1 < \frac{\pi}{2} \text{ or } \phi_1 > \frac{6\pi(n-1)}{P} \\ \phi_i - \frac{6\pi(n-1)}{P} + A \cdot \sin\left(\phi_i - \frac{6\pi(n-1)}{P}\right) & \text{otherwise} \end{cases}$$

for period  $P = 24\text{h}$ , and various values of the the dark pulse length  $n$ .

| Peak time | Gene function                                                 | KEGG pathway                          |
|-----------|---------------------------------------------------------------|---------------------------------------|
| Dawn      | Photosynthesis, chlorophyll production and carbon fixation    | 195, 860, 710                         |
|           | Biosynthesis of amino acids                                   | 290, 400                              |
|           | tRNA                                                          | 970                                   |
|           | Steroid synthesis                                             | 100                                   |
|           | Fatty acids pathways                                          | 61                                    |
|           | Metabolism of amino sugars, amino acids, and purines          | 530, 330, 252, 280, 230               |
|           | Sugar metabolism, respiration, CoA biosynthesis               | 51, 130, 770                          |
| Dusk      | Ribosome                                                      | 3010                                  |
|           | RNA polymerase                                                | 3020                                  |
|           | DNA replication, homologous recombination and mismatch repair | 3030, 3440, 3430                      |
|           | Metabolism under nutrient limitation                          | 760, 730, 40, 350, 272, 380, 450, 340 |
|           | Essential metabolic pathways                                  | 30, 920, 500                          |
|           | Biosynthesis and degradation pathways                         | 632, 626, 790                         |

TABLE I. Microarray expression data shows that pathways associated with energy production, biosynthesis and metabolism peak at subjective dawn. The expression of house-keeping genes and pathways associated with DNA replication and repair peak at subjective dusk. Data reprinted from Vijayan *et al.* (supplemental information [1]).

## SUPPLEMENTAL REFERENCES

---

- [1] Vijayan, V., Zuzow, R. & O'Shea, E. K. Oscillations in supercoiling drive circadian gene expression in cyanobacteria. *Proceedings of the National Academy of Sciences* **106**, 22564–22568 (2009).
